# Supplementary material for: Isolation and Characterization T4- and T7-Like Phages that Infect the Bacterial Plant Pathogen Agrobacterium tumefaciens
Source: MDPI journal article supplement (doi:10.3390/v11060528), 2019-06-07
Supplement: s1 [file s1]

## Supplementary Materials

### Isolation and Characterization T4- and T7-like Phages that Infect the Bacterial Plant Pathogen, *Agrobacterium tumefaciens*

Hedieh Attai <sup>†</sup> and Pamela J.B. Brown <sup>\*</sup>

Division of Biological Sciences, University of Missouri, Columbia, MO 65211 USA

<sup>†</sup>Present address: Department of Pathology, University of California at San Diego, La Jolla, CA 92093;  
hattai@ucsd.edu

<sup>\*</sup>Correspondence: brownpb@missouri.edu; Tel.: (+1-573-884-0214)

SUPPLEMENTARY FIGURES

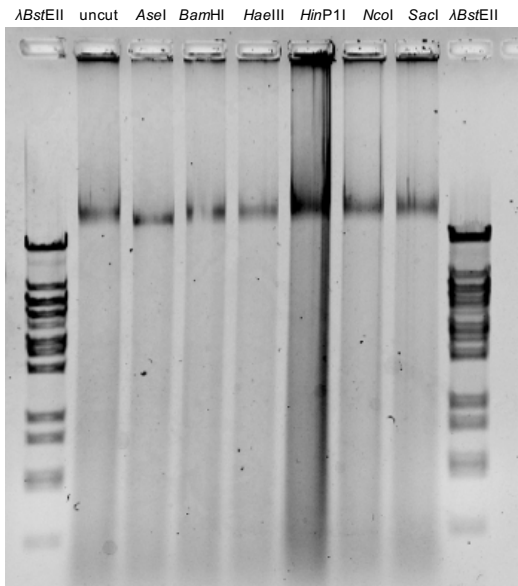

**Supplementary Figure S1:** Restriction fragment analysis of digested Atu\_ph04 genomic DNA. DNA is loaded onto a 0.7% agarose gel.

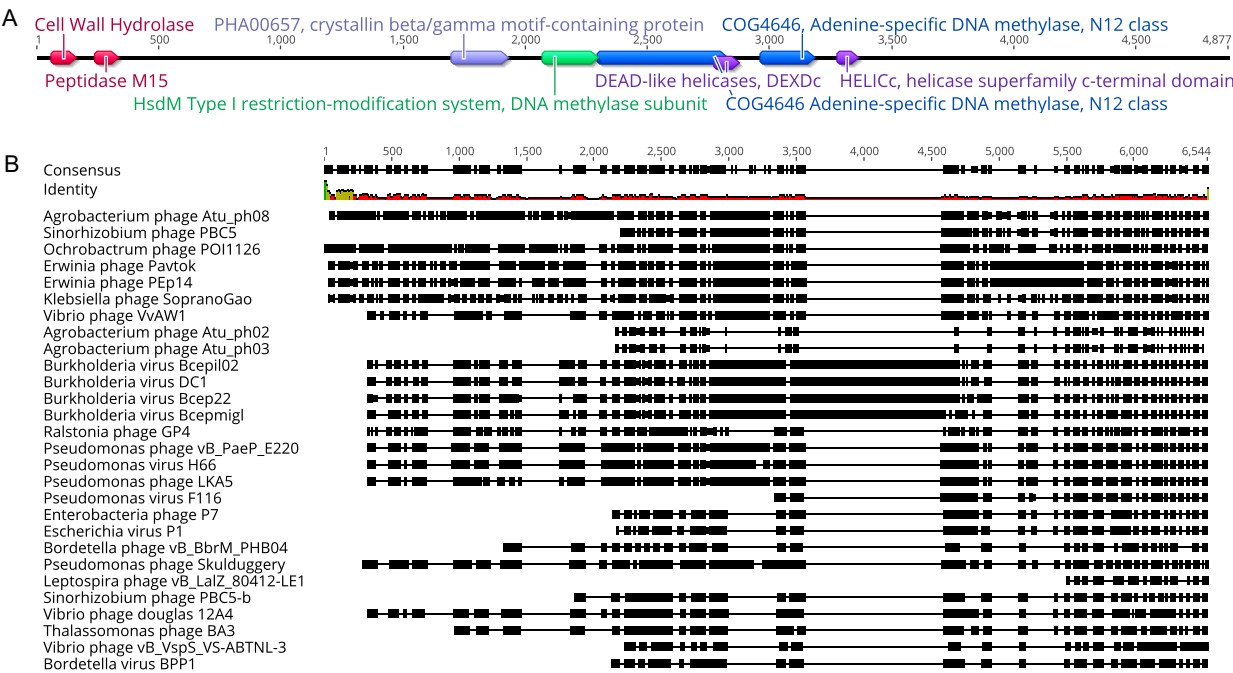

**Supplementary Figure S2:** Analysis of DarB-like protein in Atu\_ph08. (A) Domain structure of DarB-like protein in Atu\_ph08. (B) ClustalW alignment of DarB-like proteins in other T7-like phages. Dark black blocks indicate regions of synteny.

# SUPPLEMENTARY TABLES

**Supplementary Table S1:** Atu\_ph04 genes organized by predicted function.

| CDS # | RAST annotated function                                                         | Updated assigned function           | Length (bp) | Category              |
|-------|---------------------------------------------------------------------------------|-------------------------------------|-------------|-----------------------|
| 1     | hypothetical protein CDS                                                        | putative T7-like tail fiber protein | 186         | Structural            |
| 2     | hypothetical protein CDS                                                        |                                     | 600         | Hypothetical          |
| 3     | hypothetical protein CDS                                                        |                                     | 321         | Hypothetical          |
| 4     | hypothetical protein CDS                                                        |                                     | 246         | Hypothetical          |
| 5     | hypothetical protein CDS                                                        |                                     | 210         | Hypothetical          |
| 6     | UDP-galactopyranose mutase (EC 5.4.99.9) CDS                                    |                                     | 1173        | Other/Bacterial       |
| 7     | hypothetical protein CDS                                                        |                                     | 315         | Hypothetical          |
| 8     | hypothetical protein CDS                                                        |                                     | 159         | Hypothetical          |
| 9     | hypothetical protein CDS                                                        |                                     | 354         | Hypothetical          |
| 10    | N-acetylmuramoyl-L-alanine amidase (EC 3.5.1.28) CDS                            |                                     | 942         | Lysis                 |
| 11    | hypothetical protein CDS                                                        |                                     | 216         | Hypothetical          |
| 12    | hypothetical protein CDS                                                        |                                     | 516         | Hypothetical          |
| 13    | hypothetical protein CDS                                                        |                                     | 366         | Hypothetical          |
| 14    | Phage protein CDS                                                               |                                     | 351         | Hypothetical          |
| 15    | hypothetical protein CDS                                                        |                                     | 399         | Hypothetical          |
| 16    | hypothetical protein CDS                                                        |                                     | 213         | Hypothetical          |
| 17    | Phosphohydrolase (MutT/nudix family protein) CDS                                |                                     | 588         | Nucleotide metabolism |
| 18    | hypothetical protein CDS                                                        |                                     | 600         | Hypothetical          |
| 19    | hypothetical protein CDS                                                        |                                     | 249         | Hypothetical          |
| 20    | hypothetical protein CDS                                                        |                                     | 309         | Hypothetical          |
| 21    | hypothetical protein CDS                                                        |                                     | 546         | Hypothetical          |
| 22    | hypothetical protein CDS                                                        |                                     | 198         | Hypothetical          |
| 23    | hypothetical protein CDS                                                        | putative glutaredoxin               | 282         | Nucleotide metabolism |
| 24    | Ribonucleotide reductase of class Ia (aerobic), alpha subunit (EC 1.17.4.1) CDS |                                     | 1662        | Nucleotide metabolism |

|    |                                                                                |                                          |      |                       |
|----|--------------------------------------------------------------------------------|------------------------------------------|------|-----------------------|
| 25 | Ribonucleotide reductase of class Ia (aerobic), beta subunit (EC 1.17.4.1) CDS |                                          | 1053 | Nucleotide metabolism |
| 26 | Phage-associated DNA primase (EC 2.7.7.-) #gp61 CDS                            |                                          | 1041 | DNA replication       |
| 27 | hypothetical protein CDS                                                       |                                          | 339  | Hypothetical          |
| 28 | hypothetical protein CDS                                                       |                                          | 402  | Hypothetical          |
| 29 | hypothetical protein CDS                                                       |                                          | 354  | Hypothetical          |
| 30 | hypothetical protein CDS                                                       |                                          | 297  | Hypothetical          |
| 31 | hypothetical protein CDS                                                       |                                          | 510  | Hypothetical          |
| 32 | hypothetical protein CDS                                                       |                                          | 480  | Hypothetical          |
| 33 | hypothetical protein CDS                                                       | putative uracil DNA glycosylase          | 468  | DNA repair            |
| 34 | hypothetical protein CDS                                                       |                                          | 273  | Hypothetical          |
| 35 | hypothetical protein CDS                                                       |                                          | 405  | Hypothetical          |
| 36 | hypothetical protein CDS                                                       |                                          | 255  | Hypothetical          |
| 37 | hypothetical protein CDS                                                       |                                          | 219  | Hypothetical          |
| 38 | hypothetical protein CDS                                                       |                                          | 291  | Hypothetical          |
| 39 | hypothetical protein CDS                                                       |                                          | 207  | Hypothetical          |
| 40 | Phage DNA end protector during packaging CDS                                   |                                          | 627  | DNA associated        |
| 41 | hypothetical protein CDS                                                       | putative baseplate tail tube initiator   | 537  | Structural            |
| 42 | Phage baseplate hub subunit # T4-like gp26 CDS                                 |                                          | 702  | Structural            |
| 43 | hypothetical protein CDS                                                       | putative baseplate hub assembly catalyst | 177  | Structural            |
| 44 | hypothetical protein CDS                                                       |                                          | 381  | Hypothetical          |
| 45 | hypothetical protein CDS                                                       |                                          | 1812 | Hypothetical          |
| 46 | hypothetical protein CDS                                                       |                                          | 273  | Hypothetical          |
| 47 | Single stranded DNA-binding protein, phage-associated CDS                      |                                          | 1011 | DNA replication       |
| 48 | hypothetical protein CDS                                                       |                                          | 555  | Hypothetical          |
| 49 | hypothetical protein CDS                                                       |                                          | 312  | Hypothetical          |

|    |                                                                               |                                                     |      |                 |
|----|-------------------------------------------------------------------------------|-----------------------------------------------------|------|-----------------|
| 50 | hypothetical protein CDS                                                      |                                                     | 288  | Hypothetical    |
| 51 | hypothetical protein CDS                                                      |                                                     | 540  | Hypothetical    |
| 52 | hypothetical protein CDS                                                      | putative homing endonuclease                        | 654  | DNA replication |
| 53 | Phage terminase, large subunit #T4-like phage Gp17 CDS                        |                                                     | 1734 | Structural      |
| 54 | T4-like phage baseplate hub + tail lysozyme CDS                               |                                                     | 2562 | Structural      |
| 55 | hypothetical protein CDS                                                      |                                                     | 126  | Hypothetical    |
| 56 | hypothetical protein CDS                                                      |                                                     | 285  | Hypothetical    |
| 57 | hypothetical protein CDS                                                      |                                                     | 507  | Hypothetical    |
| 58 | T4-like phage protein, T4 GC1630 CDS                                          | putative homing endonuclease                        | 459  | DNA replication |
| 59 | probable ATP-dependent helicase CDS                                           |                                                     | 1614 | DNA replication |
| 60 | Phage endonuclease CDS                                                        | denV endonuclease V, N-glycosylase UV repair enzyme | 318  | DNA repair      |
| 61 | hypothetical protein CDS                                                      |                                                     | 264  | Hypothetical    |
| 62 | hypothetical protein CDS                                                      |                                                     | 414  | Hypothetical    |
| 63 | Phage ribonuclease H (EC 3.1.26.4) #T4-like phage Rnh #T4 GC0870 CDS          |                                                     | 909  | DNA replication |
| 64 | hypothetical protein CDS                                                      |                                                     | 720  | Hypothetical    |
| 65 | hypothetical protein CDS                                                      |                                                     | 438  | Hypothetical    |
| 66 | hypothetical protein CDS                                                      | tail completion and sheath stabilizer protein       | 522  | Structural      |
| 67 | Single stranded DNA-binding protein, phage-associated #T4-like phage Gp32 CDS |                                                     | 486  | DNA replication |
| 68 | hypothetical protein CDS                                                      | putative homing endonuclease                        | 765  | DNA replication |
| 69 | Phage head completion protein CDS                                             |                                                     | 459  | Structural      |

|    |                                                                   |                                                       |      |                 |
|----|-------------------------------------------------------------------|-------------------------------------------------------|------|-----------------|
| 70 | Phage tail sheath CDS                                             |                                                       | 2517 | Structural      |
| 71 | hypothetical protein CDS                                          | putative tail tube monomer                            | 627  | Structural      |
| 72 | Phage portal vertex of the head #T4-like phage Gp20 CDS           |                                                       | 1575 | Structural      |
| 73 | hypothetical protein CDS                                          |                                                       | 153  | Hypothetical    |
| 74 | Phage prohead core protein CDS                                    |                                                       | 666  | Structural      |
| 75 | MJ0042 family finger-like protein CDS                             |                                                       | 1131 | Hypothetical    |
| 76 | Phage major capsid protein of Caudovirales CDS                    |                                                       | 1332 | Structural      |
| 77 | hypothetical protein CDS                                          |                                                       | 183  | Hypothetical    |
| 78 | DNA helicase, phage-associated CDS                                |                                                       | 1503 | DNA replication |
| 79 | hypothetical protein CDS                                          |                                                       | 324  | Hypothetical    |
| 80 | hypothetical protein CDS                                          | putative terminase DNA packaging enzyme small subunit | 504  | DNA associated  |
| 81 | hypothetical protein CDS                                          |                                                       | 186  | Hypothetical    |
| 82 | hypothetical protein CDS                                          | putative base plate wedge subunit                     | 387  | Structural      |
| 83 | gp6 baseplate wedge subunit CDS                                   |                                                       | 1782 | Structural      |
| 84 | hypothetical protein CDS                                          | baseplate wedge subunit-like protein                  | 3114 | Structural      |
| 85 | hypothetical protein CDS                                          |                                                       | 1227 | Hypothetical    |
| 86 | Phage protein CDS                                                 |                                                       | 1545 | Hypothetical    |
| 87 | Phosphate starvation-inducible protein PhoH, predicted ATPase CDS |                                                       | 783  | Other/Bacterial |
| 88 | hypothetical protein CDS                                          |                                                       | 348  | Hypothetical    |
| 89 | RNA polymerase ECF-type sigma factor CDS                          |                                                       | 483  | Transcription   |
| 90 | hypothetical protein CDS                                          |                                                       | 294  | Hypothetical    |

|     |                                                                                  |                                               |      |                  |
|-----|----------------------------------------------------------------------------------|-----------------------------------------------|------|------------------|
| 91  | hypothetical protein CDS                                                         |                                               | 345  | Hypothetical     |
| 92  | hypothetical protein CDS                                                         |                                               | 150  | Hypothetical     |
| 93  | hypothetical protein CDS                                                         | putative baseplate tail tube cap              | 780  | Structural       |
| 94  | hypothetical protein CDS                                                         | putative base plate wedge component           | 579  | Structural       |
| 95  | hypothetical protein CDS                                                         |                                               | 414  | Hypothetical     |
| 96  | Phage recombination protein CDS                                                  |                                               | 1164 | DNA associated   |
| 97  | hypothetical protein CDS                                                         | DNA primase/helicase                          | 1434 | DNA replication  |
| 98  | hypothetical protein CDS                                                         | putative holliday junction resolvase          | 624  | DNA associated   |
| 99  | hypothetical protein CDS                                                         |                                               | 435  | Hypothetical     |
| 100 | hypothetical protein CDS                                                         | 5'-deoxynucleotidase                          | 621  | DNA associated   |
| 101 | hypothetical protein CDS                                                         | putative deoxynucleotide monophosphate kinase | 786  | DNA associated   |
| 102 | hypothetical protein CDS                                                         |                                               | 363  | Hypothetical     |
| 103 | hypothetical protein CDS                                                         |                                               | 465  | Hypothetical     |
| 104 | Deoxycytidylate 5-hydroxymethyltransferase (EC 2.1.2.8) CDS                      |                                               | 744  | DNA modification |
| 105 | hypothetical protein CDS                                                         |                                               | 1017 | Hypothetical     |
| 106 | hypothetical protein CDS                                                         |                                               | 642  | Hypothetical     |
| 107 | hypothetical protein CDS                                                         |                                               | 594  | Hypothetical     |
| 108 | hypothetical protein CDS                                                         |                                               | 423  | Hypothetical     |
| 109 | hypothetical protein CDS                                                         |                                               | 378  | Hypothetical     |
| 110 | Phage DNA topoisomerase large subunit (EC 5.99.1.3) #T4-like gp60 #T4 GC1464 CDS |                                               | 1938 | DNA replication  |
| 111 | hypothetical protein CDS                                                         |                                               | 306  | Hypothetical     |
| 112 | hypothetical protein CDS                                                         |                                               | 552  | Hypothetical     |

|     |                                                                                  |                                                |      |                 |
|-----|----------------------------------------------------------------------------------|------------------------------------------------|------|-----------------|
| 113 | Topoisomerase IV subunit A (EC 5.99.1.-) CDS                                     |                                                | 1365 | DNA replication |
| 114 | hypothetical protein CDS                                                         |                                                | 120  | Hypothetical    |
| 115 | hypothetical protein CDS                                                         |                                                | 336  | Hypothetical    |
| 116 | COG1896: Predicted hydrolases of HD superfamily CDS                              |                                                | 723  | Lysis           |
| 117 | hypothetical protein CDS                                                         |                                                | 336  | Hypothetical    |
| 118 | hypothetical protein CDS                                                         |                                                | 360  | Hypothetical    |
| 119 | hypothetical protein CDS                                                         | sigma factor for late transcription            | 513  | Transcription   |
| 120 | hypothetical protein CDS                                                         | recombination endonuclease subunit             | 951  | DNA associated  |
| 121 | Phage recombination-related endonuclease Gp46 CDS                                |                                                | 1647 | DNA associated  |
| 122 | hypothetical protein CDS                                                         | sliding clamp DNA polymerase accessory protein | 729  | DNA replication |
| 123 | Replication factor C small subunit CDS                                           | Sliding clamp loader subunit                   | 948  | DNA replication |
| 124 | hypothetical protein CDS                                                         | putative clamp loader subunit                  | 405  | DNA replication |
| 125 | hypothetical protein CDS                                                         |                                                | 177  | Hypothetical    |
| 126 | hypothetical protein CDS                                                         |                                                | 159  | Hypothetical    |
| 127 | hypothetical protein CDS                                                         |                                                | 267  | Hypothetical    |
| 128 | hypothetical protein CDS                                                         |                                                | 690  | Hypothetical    |
| 129 | hypothetical protein CDS                                                         |                                                | 258  | Hypothetical    |
| 130 | hypothetical protein CDS                                                         |                                                | 381  | Hypothetical    |
| 131 | hypothetical protein CDS                                                         |                                                | 210  | Hypothetical    |
| 132 | hypothetical protein CDS                                                         |                                                | 234  | Hypothetical    |
| 133 | DNA polymerase (EC 2.7.7.7), phage-associated #T4-like phage gp43 #T4 GC0178 CDS |                                                | 2640 | DNA replication |
| 134 | hypothetical protein CDS                                                         |                                                | 768  | Hypothetical    |
| 135 | hypothetical protein CDS                                                         |                                                | 120  | Hypothetical    |



|     |                                       |                                                       |      |                       |
|-----|---------------------------------------|-------------------------------------------------------|------|-----------------------|
| 136 | hypothetical protein CDS              |                                                       | 303  | Hypothetical          |
| 137 | hypothetical protein CDS              |                                                       | 546  | Hypothetical          |
| 138 | DNA ligase, phage-associated CDS      |                                                       | 1257 | DNA replication       |
| 139 | hypothetical protein CDS              |                                                       | 336  | Hypothetical          |
| 140 | hypothetical protein CDS              |                                                       | 213  | Hypothetical          |
| 141 | hypothetical protein CDS              |                                                       | 189  | Hypothetical          |
| 142 | hypothetical protein CDS              |                                                       | 201  | Hypothetical          |
| 143 | hypothetical protein CDS              |                                                       | 594  | Hypothetical          |
| 144 | hypothetical protein CDS              |                                                       | 165  | Hypothetical          |
| 145 | Phage protein CDS                     | predicted alternative thymidylate synthase            | 984  | Nucleotide metabolism |
| 146 | hypothetical protein CDS              |                                                       | 282  | Hypothetical          |
| 147 | hypothetical protein CDS              |                                                       | 165  | Hypothetical          |
| 148 | hypothetical protein CDS              | putative GT1 glycosyltransferase protein              | 1164 | Nucleotide metabolism |
| 149 | hypothetical protein CDS              |                                                       | 405  | Hypothetical          |
| 150 | FIG00451076: hypothetical protein CDS |                                                       | 255  | Hypothetical          |
| 151 | hypothetical protein CDS              | putative homing endonuclease                          | 714  | DNA associated        |
| 152 | hypothetical protein CDS              | putative ParB-like nuclease domain containing protein | 450  | DNA associated        |
| 153 | hypothetical protein CDS              |                                                       | 474  | Hypothetical          |
| 154 | hypothetical protein CDS              |                                                       | 216  | Hypothetical          |
| 155 | hypothetical protein CDS              |                                                       | 303  | Hypothetical          |
| 156 | hypothetical protein CDS              |                                                       | 303  | Hypothetical          |
| 157 | hypothetical protein CDS              |                                                       | 267  | Hypothetical          |
| 158 | hypothetical protein CDS              |                                                       | 183  | Hypothetical          |
| 159 | hypothetical protein CDS              |                                                       | 246  | Hypothetical          |
| 160 | hypothetical protein CDS              |                                                       | 501  | Hypothetical          |
| 161 | hypothetical protein CDS              |                                                       | 156  | Hypothetical          |
| 162 | hypothetical protein CDS              |                                                       | 357  | Hypothetical          |

|     |                                                                 |                                                        |     |                 |
|-----|-----------------------------------------------------------------|--------------------------------------------------------|-----|-----------------|
| 163 | Glycine-rich cell wall structural protein 1.8 precursor CDS     |                                                        | 657 | Other/Bacterial |
| 164 | hypothetical protein CDS                                        |                                                        | 480 | Hypothetical    |
| 165 | hypothetical protein CDS                                        |                                                        | 489 | Hypothetical    |
| 166 | hypothetical protein CDS                                        |                                                        | 279 | Hypothetical    |
| 167 | hypothetical protein CDS                                        |                                                        | 555 | Hypothetical    |
| 168 | hypothetical protein CDS                                        |                                                        | 135 | Hypothetical    |
| 169 | hypothetical protein CDS                                        | DNA repair exonuclease                                 | 489 | DNA repair      |
| 170 | hypothetical protein CDS                                        |                                                        | 267 | Hypothetical    |
| 171 | hypothetical protein CDS                                        |                                                        | 207 | Hypothetical    |
| 172 | hypothetical protein CDS                                        |                                                        | 195 | Hypothetical    |
| 173 | hypothetical protein CDS                                        |                                                        | 198 | Hypothetical    |
| 174 | hypothetical protein CDS                                        |                                                        | 201 | Hypothetical    |
| 175 | hypothetical protein CDS                                        |                                                        | 417 | Hypothetical    |
| 176 | hypothetical protein CDS                                        |                                                        | 363 | Hypothetical    |
| 177 | hypothetical protein CDS                                        |                                                        | 300 | Hypothetical    |
| 178 | hypothetical protein CDS                                        |                                                        | 198 | Hypothetical    |
| 179 | hypothetical protein CDS                                        |                                                        | 225 | Hypothetical    |
| 180 | hypothetical protein CDS                                        | von Willebrand factor type A domain containing protein | 702 | Other/Bacterial |
| 181 | hypothetical protein CDS                                        |                                                        | 225 | Hypothetical    |
| 182 | hypothetical protein CDS                                        |                                                        | 303 | Hypothetical    |
| 183 | hypothetical protein CDS                                        |                                                        | 207 | Hypothetical    |
| 184 | hypothetical protein CDS                                        |                                                        | 276 | Hypothetical    |
| 185 | Polymerase epsilon subunit CDS                                  |                                                        | 858 | DNA associated  |
| 186 | hypothetical protein CDS                                        |                                                        | 285 | Hypothetical    |
| 187 | hypothetical protein CDS                                        |                                                        | 291 | Hypothetical    |
| 188 | hypothetical protein CDS                                        |                                                        | 264 | Hypothetical    |
| 189 | dCMP deaminase (EC 3.5.4.12); Late competence protein ComEB CDS |                                                        | 600 | DNA associated  |
| 190 | hypothetical protein CDS                                        |                                                        | 510 | Hypothetical    |

|     |                                                 |                      |      |                 |
|-----|-------------------------------------------------|----------------------|------|-----------------|
| 191 | hypothetical protein CDS                        |                      | 210  | Hypothetical    |
| 192 | hypothetical protein CDS                        |                      | 234  | Hypothetical    |
| 193 | hypothetical protein CDS                        |                      | 462  | Hypothetical    |
| 194 | Phage protein CDS                               | putative exonuclease | 825  | DNA associated  |
| 195 | hypothetical protein CDS                        | DNA primase          | 531  | DNA replication |
| 196 | hypothetical protein CDS                        |                      | 282  | Hypothetical    |
| 197 | hypothetical protein CDS                        |                      | 363  | Hypothetical    |
| 198 | hypothetical protein CDS                        |                      | 372  | Hypothetical    |
| 199 | hypothetical protein CDS                        |                      | 231  | Hypothetical    |
| 200 | hypothetical protein CDS                        |                      | 234  | Hypothetical    |
| 201 | hypothetical protein CDS                        |                      | 261  | Hypothetical    |
| 202 | hypothetical protein CDS                        |                      | 423  | Hypothetical    |
| 203 | hypothetical protein CDS                        |                      | 300  | Hypothetical    |
| 204 | hypothetical protein CDS                        |                      | 330  | Hypothetical    |
| 205 | hypothetical protein CDS                        |                      | 744  | Hypothetical    |
| 206 | hypothetical protein CDS                        |                      | 609  | Hypothetical    |
| 207 | hypothetical protein CDS                        |                      | 231  | Hypothetical    |
| 208 | hypothetical protein CDS                        |                      | 201  | Hypothetical    |
| 209 | hypothetical protein CDS                        |                      | 435  | Hypothetical    |
| 210 | hypothetical protein CDS                        |                      | 510  | Hypothetical    |
| 211 | hypothetical protein CDS                        |                      | 579  | Hypothetical    |
| 212 | hypothetical protein CDS                        |                      | 1347 | Hypothetical    |
| 213 | T4-like phage baseplate hub + tail lysozyme CDS |                      | 876  | Structural      |
| 214 | hypothetical protein CDS                        |                      | 297  | Hypothetical    |
| 215 | Phage neck protein #Gp13 CDS                    |                      | 756  | Structural      |
| 216 | Gp14 neck protein CDS                           |                      | 843  | Structural      |
| 217 | hypothetical protein CDS                        |                      | 360  | Hypothetical    |
| 218 | Phage tail assembly CDS                         |                      | 882  | Structural      |
| 219 | hypothetical protein CDS                        | baseplate wedge      | 1461 | Structural      |
| 220 | Phage virulence-associated VriC protein CDS     | VriC protein         | 5088 | Structural      |
| 221 | hypothetical protein CDS                        |                      | 207  | Hypothetical    |
| 222 | Phage tail fibers CDS                           |                      | 1791 | Structural      |

|     |                                          |  |      |              |
|-----|------------------------------------------|--|------|--------------|
| 223 | FIG00920814: hypothetical<br>protein CDS |  | 1149 | Hypothetical |
|-----|------------------------------------------|--|------|--------------|

**Supplementary Table S2:** Comparative analysis of Atu\_ph04 gene products with related phages.

| gp # | Functional annotation                                         | vB_RleM_P10VF | phiM9     | Cr30     | syn9     | syn30    | syn33    | T4       | Atu_ph07  | phiM12   | Ccr Colossus | phiN3    | KVP 40   | Melville |
|------|---------------------------------------------------------------|---------------|-----------|----------|----------|----------|----------|----------|-----------|----------|--------------|----------|----------|----------|
| 6    | UDP-galactopyranose mutase                                    | 3.00E-125     | 1.00E-128 |          |          |          |          |          |           |          |              |          |          |          |
| 9    | hypothetical                                                  | 9.00E-22      |           |          |          |          |          |          |           |          |              |          |          |          |
| 10   | N-acetylmuramoyl-L-alanine amidase                            | 4.00E-90      | 1.00E-87  |          |          |          |          |          |           |          |              |          |          |          |
| 11   | hypothetical                                                  | 6.00E-12      | 5.00E-14  |          |          |          |          |          |           |          |              |          |          |          |
| 12   | hypothetical                                                  | 1.00E-31      | 2.00E-38  |          |          |          |          |          |           |          |              |          |          |          |
| 13   | hypothetical                                                  |               | 4.00E-27  |          |          |          |          |          |           |          |              |          |          |          |
| 14   | hypothetical                                                  | 1.00E-26      | 1.00E-21  |          |          |          |          |          |           |          |              |          |          |          |
| 15   | hypothetical                                                  | 9.00E-17      |           |          |          |          |          |          |           | 4.00E-11 |              |          |          |          |
| 17   | Phosphohydrolase (MutT/nudix family protein)                  |               |           | 7.00E-16 |          |          |          |          |           | 5.00E-23 | 9.00E-24     | 6.00E-23 |          |          |
| 20   | hypothetical                                                  |               |           |          |          |          |          |          |           |          | 2.00E-11     |          |          |          |
| 23   | hypothetical                                                  | 2.00E-23      | 1.00E-20  |          |          |          |          |          |           |          |              |          |          |          |
| 24   | Ribonucleotide reductase of class Ia (aerobic), alpha subunit | 0             | 0         |          | 3.00E-17 | 2.00E-16 | 2.00E-16 | 9.00E-17 | 0         |          | 5.00E-70     |          | 2.00E-17 | 1.00E-16 |
| 25   | Ribonucleotide reductase of class Ia (aerobic), beta subunit  | 4.00E-156     | 1.00E-162 |          |          |          |          |          | 3.00E-104 |          |              |          |          |          |

[illegible]

[illegible]

[illegible]



[illegible]

[illegible]



|     |                                                                      |           |           |              |              |              |              |              |          |          |  |          |              |          |
|-----|----------------------------------------------------------------------|-----------|-----------|--------------|--------------|--------------|--------------|--------------|----------|----------|--|----------|--------------|----------|
| 164 | hypothetical                                                         | 7.00E-13  | 2.00E-23  |              |              |              |              |              |          |          |  |          |              |          |
| 165 | hypothetical                                                         | 3.00E-30  | 4.00E-37  |              |              |              |              |              |          |          |  |          |              |          |
| 166 | hypothetical                                                         |           | 0.001     |              |              |              |              |              | 2.00E-04 |          |  |          |              |          |
| 167 | hypothetical                                                         | 1.00E-09  |           |              |              |              |              |              |          |          |  |          |              |          |
| 168 | hypothetical                                                         | 4.00E-04  |           |              |              |              |              |              |          |          |  |          |              |          |
| 169 | DNA repair<br>exonuclease                                            | 1.00E-25  | 2.00E-33  |              |              |              |              |              | 3.00E-16 | 2.00E-31 |  | 1.00E-31 |              |          |
| 180 | von Willebrand<br>factor type A<br>domain containing<br>protein      | 1.00E-81  |           |              |              |              |              |              |          |          |  |          |              |          |
| 182 | hypothetical                                                         |           |           |              |              |              |              |              | 6.00E-16 | 7.00E-27 |  |          | 4.00<br>E-04 |          |
| 185 | Polymerase epsilon<br>subunit                                        | 7.00E-112 | 3.00E-112 |              |              |              |              |              | 7.00E-28 |          |  |          |              |          |
| 188 | hypothetical                                                         | 5.00E-14  |           |              |              |              |              |              |          |          |  |          |              |          |
| 189 | dCMP deaminase<br>(EC 3.5.4.12); Late<br>competence protein<br>ComEB | 1.00E-49  | 1.00E-49  |              |              |              |              | 9.00E-<br>10 |          |          |  |          | 3.00<br>E-14 | 4.00E-11 |
| 190 | hypothetical                                                         | 2.00E-09  | 1.00E-10  |              |              |              |              |              |          |          |  |          |              |          |
| 192 | hypothetical                                                         | 0.001     | 7.00E-04  |              |              |              |              |              |          |          |  |          |              |          |
| 194 | putative<br>exonuclease                                              | 7.00E-112 | 1.00E-100 | 1.00E-<br>26 | 6.00E-<br>22 | 5.00E-<br>21 | 1.00E-<br>21 |              | 2.00E-14 |          |  | 3.00E-22 |              |          |
| 201 | hypothetical                                                         | 2.00E-07  | 7.00E-07  |              |              |              |              |              |          |          |  |          |              |          |
| 202 | hypothetical                                                         | 3.00E-27  |           |              |              |              |              |              |          |          |  |          |              |          |
| 206 | hypothetical                                                         | 6.00E-14  |           |              |              |              |              |              | 2.00E-12 |          |  |          |              |          |

|     |                                             |           |           |          |          |          |          |          |    |          |   |          |          |          |
|-----|---------------------------------------------|-----------|-----------|----------|----------|----------|----------|----------|----|----------|---|----------|----------|----------|
| 207 | hypothetical                                | 2.00E-06  |           |          |          |          |          |          |    |          |   |          |          |          |
| 209 | hypothetical                                | 2.00E-11  | 3.00E-20  |          |          |          |          |          |    |          |   |          |          |          |
| 212 | hypothetical                                | 0         | 0         |          |          |          | 2.00E-06 |          |    |          |   |          |          |          |
| 213 | T4-like phage baseplate hub + tail lysozyme | 3.00E-147 | 3.00E-141 | 2.00E-18 | 8.00E-13 | 3.00E-13 | 4.00E-14 | 3.00E-15 |    | 4.00E-12 |   | 4.00E-12 |          | 9.00E-16 |
| 215 | Phage neck protein                          | 4.00E-106 | 3.00E-106 | 3.00E-25 | 4.00E-24 | 7.00E-20 |          | 7.00E-09 |    | 5.00E-24 |   | 2.00E-24 | 5.00E-04 | 4.00E-06 |
| 216 | Gp14 neck protein                           | 3.00E-122 | 7.00E-109 | 1.00E-14 | 1.00E-08 |          |          |          |    | 2.00E-15 |   | 3.00E-15 |          |          |
| 217 | hypothetical                                | 8.00E-37  | 6.00E-31  |          |          |          |          |          |    |          |   |          |          |          |
| 218 | Phage tail assembly                         | 1.00E-82  | 3.00E-106 | 7.00E-24 | 9.00E-24 | 6.00E-19 | 2.00E-26 |          |    | 2.00E-18 |   |          | 5.00E-14 |          |
| 219 | baseplate wedge                             | 4.00E-147 | 2.00E-170 | 7.00E-09 |          |          |          |          |    |          |   |          |          |          |
| 220 | Phage virulence-associated VriC protein     | 0         | 0         | 3.00E-28 | 6.00E-41 | 4.00E-43 | 2.00E-42 |          |    | 9.00E-69 |   | 4.00E-67 |          |          |
| 221 | hypothetical                                |           | 7.00E-17  | 9.00E-05 |          |          |          |          |    |          |   |          |          |          |
| 222 | Phage tail fibers                           | 8.00E-175 | 2.00E-167 |          |          |          |          |          |    |          |   |          |          | 2.00E-06 |
| 223 | FIG00920814: hypothetical protein           | 5.00E-66  | 7.00E-76  |          |          |          |          |          |    |          |   |          |          |          |
|     | TOTAL                                       | 115       | 109       | 32       | 23       | 23       | 24       | 25       | 22 | 30       | 7 | 25       | 29       | 26       |

**Supplementary Table S3: T4 core proteins found in Atu\_ph04.**

| T4 protein                                        | T4 protein function                        | Match in Atu_ph04* | Identity (%) | E-value | Query cover (%) | Atu_ph04 protein name                       | Atu_ph04 gp # |
|---------------------------------------------------|--------------------------------------------|--------------------|--------------|---------|-----------------|---------------------------------------------|---------------|
| <b>Phage morphogenesis</b>                        |                                            |                    |              |         |                 |                                             |               |
| gp4                                               | head completion protein                    | yes                | 39           | 1e-35   | 96              | Head completion protein                     | 69            |
| gp5                                               | baseplate lysozyme hub component           | yes                | 45           | 2e-16   | 17              | T4-like phage baseplate hub + tail lysozyme | 213           |
|                                                   |                                            |                    | 30           | 1e-15   | 32              | T4-like phage baseplate hub + tail lysozyme | 54            |
| gp13                                              | head completion protein                    | unresolved         | 21           | 6e-08   | 99              | Neck protein                                | 215           |
| gp15                                              | tail completion protein                    | yes                | 25           | 1e-11   | 74              | Phage tail assembly                         | 218           |
| gp17                                              | subunit of the terminase for DNA packaging | yes                | 37           | 7e-107  | 81              | Terminase large subunit                     | 53            |
| gp18                                              | tail tube subunit                          | yes                | 28           | 9e-32   | 91              | Tail sheath                                 | 70            |
| gp20                                              | head portal vertex protein                 | yes                | 36           | 2e-98   | 85              | Portal vertex of the head                   | 72            |
| gp21                                              | prohead core protein and protease          | yes                | 33           | 6e-16   | 66              | Prohead core protein                        | 74            |
| gp22                                              | prohead core protein                       | no                 |              |         |                 |                                             |               |
| gp23                                              | precursor of major head protein            | yes                | 34           | 4e-17   | 96              | Major capsid protein                        | 76            |
| gp25                                              | base plate wedge subunit                   | no                 |              |         |                 |                                             |               |
| gp34                                              | proximal tail fiber protein subunit        | no                 |              |         |                 |                                             |               |
| gp36                                              | small distal tail fiber protein subunit    | no                 |              |         |                 |                                             |               |
| <b>DNA replication, repair, and recombination</b> |                                            |                    |              |         |                 |                                             |               |

|                             |                                                              |     |    |       |    |                                                            |     |
|-----------------------------|--------------------------------------------------------------|-----|----|-------|----|------------------------------------------------------------|-----|
| gp43                        | DNA polymerase                                               | yes | 28 | 7e-83 | 97 | DNA polymerase                                             | 133 |
| gp44                        | sliding clamp loader<br>complex tetramer                     | yes | 32 | 6e-47 | 99 | Replication factor C small subunit                         | 123 |
| gp41                        | helicase-primer complex<br>hexamer                           | no  |    |       |    |                                                            |     |
| gp46                        | subunit of a recombination<br>nuclease complex               | yes | 29 | 2e-66 | 99 | Phage recombination-related endonuclease                   | 121 |
| gp47                        | subunit of a recombination<br>nuclease complex               | no  |    |       |    |                                                            |     |
| UvsW                        | recombination DNA-RNA<br>helicase, DNA-dependent<br>ATPase   | yes | 33 | 8e-71 | 82 | DNA helicase                                               | 78  |
| <b>Auxillary metabolism</b> |                                                              |     |    |       |    |                                                            |     |
| nrdA                        | subunit of an aerobic<br>ribonucleotide reductase<br>complex | yes | 23 | 4e-18 | 58 | Ribonucleotide reductase of 1a (aerobic), alpha<br>subunit | 24  |
| nrdB                        | subunit of an aerobic<br>ribonucleotide reductase<br>complex | no  |    |       |    |                                                            |     |
| <b>Gene expression</b>      |                                                              |     |    |       |    |                                                            |     |
| gp55                        | sigma factor for late<br>transcription                       | no  |    |       |    |                                                            |     |

\*Atu\_ph04 matches with E-values above 1E-10 are considered “yes” matches and those between 1E-10 and 1E-03 are “unresolved.” Matches with E-values lower than 1E-03 were not considered significant.

**Supplementary Table S4:** Atu\_ph08 genes organized by predicted function.

| CDS # | RAST annotated function                 | Updated assigned function            | Length (bp) | Category                       |
|-------|-----------------------------------------|--------------------------------------|-------------|--------------------------------|
| 1     | Phage protein CDS                       | XRE transcriptional regulator        | 300         | Transcription                  |
| 2     | hypothetical protein CDS                |                                      | 297         | Hypothetical                   |
| 3     | Phage protein CDS                       |                                      | 417         | Hypothetical                   |
| 4     | FIG00451076: hypothetical protein CDS   | DUF2312 domain-containing protein    | 396         | Hypothetical                   |
| 5     | hypothetical protein CDS                | GcrA cell cycle regulator            | 588         | Transcription                  |
| 6     | hypothetical protein CDS                |                                      | 495         | Hypothetical                   |
| 7     | C-5 cytosine-specific DNA methylase CDS |                                      | 1866        | DNA modification               |
| 8     | hypothetical protein CDS                |                                      | 351         | Hypothetical                   |
| 9     | hypothetical protein CDS                | putative PRK12775-containing protein | 246         | Posttranslational modification |
| 10    | hypothetical protein CDS                | NERD domain-containing protein       | 741         | DNA processing                 |
| 11    | Phage protein CDS                       |                                      | 627         | Hypothetical                   |
| 12    | Phage protein CDS                       |                                      | 804         | Hypothetical                   |
| 13    | probable terminase large subunit CDS    |                                      | 1557        | Structural                     |
| 14    | Phage protein CDS                       |                                      | 429         | Hypothetical                   |
| 15    | Phage portal protein CDS                |                                      | 2232        | Structural                     |
| 16    | Phage protein CDS                       |                                      | 1011        | Hypothetical                   |
| 17    | hypothetical protein CDS                |                                      | 195         | Hypothetical                   |
| 18    | hypothetical protein CDS                |                                      | 294         | Hypothetical                   |
| 19    | hypothetical protein CDS                |                                      | 477         | Hypothetical                   |



|    |                                                                          |                                                              |       |                  |
|----|--------------------------------------------------------------------------|--------------------------------------------------------------|-------|------------------|
| 20 | Methyl-accepting chemotaxis protein I (serine chemoreceptor protein) CDS |                                                              | 786   | Other/Bacterial  |
| 21 | helicase, Snf2 family CDS                                                | Adenine-specific DNA methylase, N12 class; DarB-like protein | 14634 | DNA modification |
| 22 | Phage protein CDS                                                        |                                                              | 1311  | Hypothetical     |
| 23 | Phage protein CDS                                                        | tail fiber domain-containing protein                         | 1161  | Structural       |
| 24 | Phage protein CDS                                                        | N-acetyltransferase                                          | 450   | DNA modification |
| 25 | hypothetical protein CDS                                                 |                                                              | 246   | Hypothetical     |
| 26 | Phage protein CDS                                                        | putative virion structural protein                           | 1740  | Structural       |
| 27 | hypothetical protein CDS                                                 | DUF4376 domain-containing protein                            | 603   | Hypothetical     |
| 28 | Phage tail fibers CDS                                                    |                                                              | 1074  | Structural       |
| 29 | Phage protein CDS                                                        |                                                              | 279   | Hypothetical     |
| 30 | hypothetical protein CDS                                                 |                                                              | 312   | Hypothetical     |
| 31 | Phage protein CDS                                                        | major capsid protein                                         | 417   | Structural       |
| 32 | Phage protein CDS                                                        | DUF4238 domain-containing protein                            | 627   | Hypothetical     |
| 33 | Phage protein CDS                                                        |                                                              | 702   | Hypothetical     |
| 34 | hypothetical protein CDS                                                 |                                                              | 363   | Hypothetical     |
| 35 | Phage protein CDS                                                        |                                                              | 462   | Hypothetical     |
| 36 | Phage protein CDS                                                        | N4-gp56 family major capsid protein                          | 1131  | Structural       |
| 37 | protein of unknown function DUF847 CDS                                   | secretion activator protein; lysozyme-like protein           | 753   | Lysis            |
| 38 | hypothetical protein CDS                                                 | Holin of 3TMs, for gene-transfer release                     | 525   | Lysis            |
| 39 | Phage protein CDS                                                        |                                                              | 333   | Hypothetical     |

|    |                                                     |                                      |      |                   |
|----|-----------------------------------------------------|--------------------------------------|------|-------------------|
| 40 | hypothetical protein CDS                            | AlpA family phage regulatory protein | 231  | Transcription     |
| 41 | Integrase CDS                                       |                                      | 1299 | DNA recombination |
| 42 | hypothetical protein CDS                            | Arc family DNA-binding protein       | 192  | DNA-associated    |
| 43 | hypothetical protein CDS                            |                                      | 402  | Hypothetical      |
| 44 | hypothetical protein CDS                            |                                      | 498  | Hypothetical      |
| 45 | hypothetical protein CDS                            |                                      | 189  | Hypothetical      |
| 46 | hypothetical protein CDS                            | DUF551 domain-containing protein     | 186  | Hypothetical      |
| 47 | hypothetical protein CDS                            |                                      | 324  | Hypothetical      |
| 48 | hypothetical protein CDS                            |                                      | 219  | Hypothetical      |
| 49 | hypothetical protein CDS                            | 3'-5' exoribonuclease                | 705  | DNA-associated    |
| 50 | hypothetical protein CDS                            |                                      | 264  | Hypothetical      |
| 51 | hypothetical protein CDS                            |                                      | 645  | Hypothetical      |
| 52 | Phage protein CDS                                   |                                      | 330  | Hypothetical      |
| 53 | Phage DNA modification methyltransferase CDS        |                                      | 753  | DNA modification  |
| 54 | hypothetical protein CDS                            |                                      | 219  | Hypothetical      |
| 55 | Bacteriophage protein gp37 CDS                      | DUF5131 family protein               | 921  | Hypothetical      |
| 56 | COG1896: Predicted hydrolases of HD superfamily CDS | metal-dependent phosphohydrolase     | 606  | DNA modification  |
| 57 | Phage protein CDS                                   |                                      | 687  | Hypothetical      |

|    |                                   |                                                            |     |                                |
|----|-----------------------------------|------------------------------------------------------------|-----|--------------------------------|
| 58 | hypothetical protein CDS          |                                                            | 426 | Hypothetical                   |
| 59 | Phage-related protein CDS         | morphogenetic protein                                      | 708 | Structural                     |
| 60 | Phage protein CDS                 |                                                            | 399 | Hypothetical                   |
| 61 | hypothetical protein CDS          |                                                            | 231 | Hypothetical                   |
| 62 | hypothetical protein CDS          |                                                            | 525 | Hypothetical                   |
| 63 | hypothetical protein CDS          |                                                            | 159 | Hypothetical                   |
| 64 | Phage protein CDS                 | C4-dicarboxylate ABC transporter substrate-binding protein | 882 | Other/Bacterial                |
| 65 | Transcriptional regulator CDS     | C2-like repressor protein                                  | 417 | Transcription                  |
| 66 | hypothetical protein CDS          |                                                            | 219 | Hypothetical                   |
| 67 | hypothetical protein CDS          | class I SAM-dependent methyltransferase                    | 582 | DNA modification               |
| 68 | hypothetical protein CDS          |                                                            | 288 | Hypothetical                   |
| 69 | Phage protein CDS                 |                                                            | 309 | Hypothetical                   |
| 70 | hypothetical protein CDS          |                                                            | 123 | Hypothetical                   |
| 71 | Predicted periplasmic protein CDS | Clp protease                                               | 651 | Posttranslational modification |
| 72 | hypothetical protein CDS          | XRE family transcriptional regulator                       | 306 | Transcription                  |
| 73 | hypothetical protein CDS          |                                                            | 240 | Hypothetical                   |
| 74 | hypothetical protein CDS          |                                                            | 243 | Hypothetical                   |
| 75 | hypothetical protein CDS          |                                                            | 207 | Hypothetical                   |

**Supplementary Table S5:** Comparative analysis of Atu\_ph08 gene products with related phages.

| gP # | Functional annotation                                            | PBC5      | POI1126   | Soprano Gao | Pavtok    | DC1       | Bcep22    | PS-1      | phiKMV | T7 | Atu_ph03 |
|------|------------------------------------------------------------------|-----------|-----------|-------------|-----------|-----------|-----------|-----------|--------|----|----------|
| 1    | XRE transcriptional regulator                                    | 7.00E-44  |           |             |           |           |           |           |        |    |          |
| 3    | Hypothetical                                                     | 4.00E-26  | 1.00E-10  |             |           |           |           |           |        |    |          |
| 4    | Hypothetical                                                     | 1.00E-38  | 5.00E-20  |             |           |           |           |           |        |    |          |
| 10   | NERD domain-containing protein                                   |           | 1.00E-32  |             |           |           |           |           |        |    |          |
| 11   | Hypothetical                                                     | 8.00E-66  |           |             |           |           |           |           |        |    |          |
| 12   | Hypothetical                                                     | 1.00E-77  |           |             |           |           |           |           |        |    |          |
| 13   | probable terminase large subunit                                 | 0         | 0         | 1.00E-143   | 5.00E-145 | 2.00E-127 | 1.00E-127 | 2.00E-100 |        |    |          |
| 14   | Hypothetical                                                     | 6.00E-72  | 2.00E-40  | 3.00E-17    | 1.00E-17  |           | 9.00E-15  |           |        |    |          |
| 15   | Phage portal protein                                             | 0         | 0         | 0           | 0         | 0         | 0         |           |        |    |          |
| 16   | Hypothetical                                                     | 7.00E-79  | 6.00E-07  | 9.00E-11    | 2.00E-18  | 4.00E-18  | 2.00E-19  |           |        |    |          |
| 17   | Hypothetical                                                     |           |           |             |           | 6.00E-05  |           |           |        |    |          |
| 21   | Adenine-specific DNA methylase, N12 class; helicase, Snf2 family | 0         | 0         | 0           | 0         | 0         | 0         |           |        |    | 5.00E-48 |
| 22   | Hypothetical                                                     | 1.00E-106 | 2.00E-45  | 5.00E-08    | 2.00E-20  |           |           |           |        |    |          |
| 23   | tail fiber domain-containing protein                             | 0         | 4.00E-160 | 1.00E-110   | 2.00E-114 | 1.00E-75  | 3.00E-73  |           |        |    |          |
| 24   | N-acetyltransferase                                              | 3.00E-84  | 2.00E-43  | 9.00E-36    | 1.00E-35  | 3.00E-41  | 1.00E-39  |           |        |    |          |
| 25   | Hypothetical                                                     |           | 2.00E-13  |             |           | 5.00E-08  | 2.00E-08  |           |        |    |          |
| 26   | putative virion structural protein                               | 0         | 0         | 2.00E-140   | 1.00E-148 | 0.00E+00  | 1.00E-179 |           |        |    |          |
| 28   | Phage tail fibers                                                | 2.00E-31  | 3.00E-28  | 9.00E-23    | 4.00E-17  | 1.00E-26  | 2.00E-26  |           |        |    |          |
| 29   | Hypothetical                                                     | 7.00E-38  | 1.00E-31  |             |           | 2.00E-18  | 3.00E-18  |           |        |    |          |
| 31   | major capsid protein                                             | 1.00E-46  | 5.00E-49  |             |           | 2.00E-36  | 6.00E-38  |           |        |    |          |
| 32   | Hypothetical                                                     | 4.00E-76  | 6.00E-28  | 7.00E-30    | 1.00E-33  | 8.00E-45  | 2.00E-37  |           |        |    |          |
| 33   | Hypothetical                                                     | 6.00E-105 | 2.00E-54  | 4.00E-45    | 2.00E-38  | 8.00E-29  | 9.00E-23  |           |        |    |          |
| 34   | Hypothetical                                                     |           | 3.00E-12  |             |           |           |           |           |        |    |          |

|    |                                                            |           |          |           |    |           |          |   |   |   |   |
|----|------------------------------------------------------------|-----------|----------|-----------|----|-----------|----------|---|---|---|---|
| 35 | Hypothetical                                               |           | 2.00E-31 | 4.00E-12  |    | 2.00E-24  | 5.00E-34 |   |   |   |   |
| 36 | N4-gp56 family major capsid protein                        | 0         | 0        | 2.00E-155 | 0  | 3.00E-179 | 0        |   |   |   |   |
| 37 | secretion activator protein; lysozyme-like protein         |           | 7.00E-61 |           |    |           |          |   |   |   |   |
| 38 | Holin of 3TMs, for gene-transfer release                   |           | 8.00E-18 |           |    |           |          |   |   |   |   |
| 39 | Hypothetical                                               | 7.00E-26  |          |           |    |           |          |   |   |   |   |
| 41 | Integrase                                                  | 3.00E-179 |          |           |    |           |          |   |   |   |   |
| 42 | Arc family DNA-binding protein                             |           | 1.00E-22 |           |    |           |          |   |   |   |   |
| 52 | Hypothetical                                               | 5.00E-31  |          |           |    |           |          |   |   |   |   |
| 55 | Hypothetical                                               | 2.00E-89  | 7.00E-34 |           |    |           |          |   |   |   |   |
| 59 | morphogenetic protein                                      | 8.00E-29  | 1.00E-27 |           |    |           |          |   |   |   |   |
| 60 | Hypothetical                                               | 2.00E-32  |          |           |    |           |          |   |   |   |   |
| 64 | C4-dicarboxylate ABC transporter substrate-binding protein | 2.00E-165 |          |           |    |           |          |   |   |   |   |
| 65 | Transcriptional regulator                                  | 7.00E-39  |          |           |    |           |          |   |   |   |   |
| 67 | class I SAM-dependent methyltransferase                    | 7.00E-91  |          |           |    |           |          |   |   |   |   |
| 69 | Hypothetical                                               | 1.00E-21  |          |           |    |           |          |   |   |   |   |
| 72 | XRE family transcriptional regulator                       |           | 8.00E-14 |           |    |           |          |   |   |   |   |
|    | TOTAL                                                      | 30        | 27       | 14        | 13 | 16        | 16       | 1 | 0 | 0 | 1 |

**Supplementary Table S6:** Atu\_ph08 gene products present in other *Agrobacterium* phages.

| Atu_ph08 gene product | Atu_ph08 protein function              | Phage Match | Identity (%) | E-value | Query cover (%) | Protein name                       | Phage gp # |
|-----------------------|----------------------------------------|-------------|--------------|---------|-----------------|------------------------------------|------------|
| gp4                   | Hypothetical                           | 7-7-1       | 81           | 9e-40   | 59              | Hypothetical protein               | 15         |
| gp21                  | Helicase                               | Atu_ph03    | 36           | 4e-48   | 6               | Cell wall hydrolyse                | 35         |
|                       |                                        | Atu_ph02    | 36           | 4e-48   | 6               | Cell wall hydrolyse                | 32         |
|                       |                                        | Atu_ph07    | 31           | 3e-18   | 3               | Mega protein                       | 42         |
| gp37                  | protein of unknown function DUF847     | 7-7-1       | 28           | 6e-28   | 91              | Putative membrane protein          | 10         |
| gp56                  | Predicted hydrolases of HD superfamily | Atu_ph04    | 29           | 3e-20   | 92              | putative HD superfamily hydrolase  | 116        |
| gp65                  | Transcriptional regulator              | 7-7-1       | 47           | 2e-17   | 47              | Putative transcriptional regulator | 68         |
| gp67                  | Hypothetical protein                   | Atu_ph07    | 33           | 1e-20   | 80              | Hypothetical protein               | 599        |
